# Supplementary material for: Naloxone Prescriptions Among Commercially Insured Individuals at High Risk of Opioid Overdose
Source: PubMed Central journal article supplement (PMC6503491; doi:10.1001/jamanetworkopen.2019.3209), 2019-05-03
Supplement: jamanetwopen-2-e193209-s001.pdf [file jamanetwopen-2-e193209-s001.pdf]

## Supplementary Online Content

Follman S, Arora VM, Lyttle C, Moore PQ, Pho MT. Naloxone prescriptions among commercially insured individuals at high risk of opioid overdose. *JAMA Netw Open*. 2019;2(5):e193209. doi:10.1001/jamanetworkopen.2019.3209

**eTable 1.** *ICD-10* Codes for Opioid Misuse, Dependence, and Overdose

**eTable 2.** MarketScan Codes Used to Identify Emergency Department Visits

**eTable 3.** MarketScan Codes Used to Identify Outpatient Providers

**eTable 4.** *ICD-10* Codes Used to Identify Other Substance Use Disorders and Mental Health Diagnoses

**eTable 5.** Red Book Naloxone Medications

This supplementary material has been provided by the authors to give readers additional information about their work.

**eTable 1. ICD-10 Codes for Opioid Misuse, Dependence, and Overdose**

| <b>Opioid Misuse &amp; Dependence ICD-10 Codes:</b> |                                                                               |
|-----------------------------------------------------|-------------------------------------------------------------------------------|
| <b>Opioid Misuse (Abuse):</b>                       |                                                                               |
| F1110                                               | Opioid abuse, uncomplicated                                                   |
| F11120                                              | Opioid abuse with intoxication, uncomplicated                                 |
| F11121                                              | Opioid abuse with intoxication delirium                                       |
| F11122                                              | Opioid abuse with intoxication with perceptual disturbance                    |
| F11129                                              | Opioid abuse with intoxication, unspecified                                   |
| F1114                                               | Opioid abuse with opioid-induced mood disorder                                |
| F11150                                              | Opioid abuse with opioid-induced psychotic disorder with delusions            |
| F11151                                              | Opioid abuse with opioid-induced psychotic disorder with hallucinations       |
| F11159                                              | Opioid abuse with opioid-induced psychotic disorder, unspecified              |
| F11181                                              | Opioid abuse with opioid-induced sexual dysfunction                           |
| F11182                                              | Opioid abuse with opioid-induced sleep disorder                               |
| F11188                                              | Opioid abuse with other opioid-induced disorder                               |
| F1119                                               | Opioid abuse with unspecified opioid-induced disorder                         |
|                                                     |                                                                               |
| <b>Opioid Dependence and Unspecified Use:</b>       |                                                                               |
| F1120                                               | Opioid dependence, uncomplicated                                              |
| F11220                                              | Opioid dependence with intoxication, uncomplicated                            |
| F11221                                              | Opioid dependence with intoxication delirium                                  |
| F11222                                              | Opioid dependence with intoxication with perceptual disturbance               |
| F11229                                              | Opioid dependence with intoxication, unspecified                              |
| F1123                                               | Opioid dependence with withdrawal                                             |
| F1124                                               | Opioid dependence with opioid-induced mood disorder                           |
| F11250                                              | Opioid dependence with opioid-induced psychotic disorder with delusions       |
| F11251                                              | Opioid dependence with opioid-induced psychotic disorder with hallucinations  |
| F11259                                              | Opioid dependence with opioid-induced psychotic disorder, unspecified         |
| F11281                                              | Opioid dependence with opioid-induced sexual dysfunction                      |
| F11282                                              | Opioid dependence with opioid-induced sleep disorder                          |
| F11288                                              | Opioid dependence with other opioid-induced disorder                          |
| F1129                                               | Opioid dependence with unspecified opioid-induced disorder                    |
| F1190                                               | Opioid use, unspecified, uncomplicated                                        |
| F11920                                              | Opioid use, unspecified with intoxication, uncomplicated                      |
| F11921                                              | Opioid use, unspecified with intoxication delirium                            |
| F11922                                              | Opioid use, unspecified with intoxication with perceptual disturbance         |
| F11929                                              | Opioid use, unspecified with intoxication, unspecified                        |
| F1193                                               | Opioid use, unspecified with withdrawal                                       |
| F1194                                               | Opioid use, unspecified with opioid-induced mood disorder                     |
| F11950                                              | Opioid use, unspecified with opioid-induced psychotic disorder with delusions |

|                                    |                                                                                    |
|------------------------------------|------------------------------------------------------------------------------------|
| F11951                             | Opioid use, unspecified with opioid-induced psychotic disorder with hallucinations |
| F11959                             | Opioid use, unspecified with opioid-induced psychotic disorder, unspecified        |
| F11981                             | Opioid use, unspecified with opioid-induced sexual dysfunction                     |
| F11982                             | Opioid use, unspecified with opioid-induced sleep disorder                         |
| F11988                             | Opioid use, unspecified with other opioid-induced disorder                         |
| F1199                              | Opioid use, unspecified with unspecified opioid-induced disorder                   |
|                                    |                                                                                    |
|                                    |                                                                                    |
| <b>OVERDOSE ICD-10 Codes:</b>      |                                                                                    |
| <b>Adverse effects of Opioids:</b> |                                                                                    |
| T400X5<br>A                        | Adverse effect of opium, initial encounter                                         |
| T400X5<br>D                        | Adverse effect of opium, subsequent encounter                                      |
| T400X5S                            | Adverse effect of opium, sequela                                                   |
| T402X5<br>A                        | Adverse effect of other opioids, initial encounter                                 |
| T402X5<br>D                        | Adverse effect of other opioids, subsequent encounter                              |
| T402X5S                            | Adverse effect of other opioids, sequela                                           |
| T403X5<br>A                        | Adverse effect of methadone, initial encounter                                     |
| T403X5<br>D                        | Adverse effect of methadone, subsequent encounter                                  |
| T403X5S                            | Adverse effect of methadone, sequela                                               |
| T404X5<br>A                        | Adverse effect of other synthetic narcotics, initial encounter                     |
| T404X5<br>D                        | Adverse effect of other synthetic narcotics, subsequent encounter                  |
| T404X5S                            | Adverse effect of other synthetic narcotics, sequela                               |
| T40605A                            | Adverse effect of unspecified narcotics, initial encounter                         |
| T40605D                            | Adverse effect of unspecified narcotics, subsequent encounter                      |
| T40605S                            | Adverse effect of unspecified narcotics, sequela                                   |
| T40695A                            | Adverse effect of other narcotics, initial encounter                               |
| T40695D                            | Adverse effect of other narcotics, subsequent encounter                            |
| T40695S                            | Adverse effect of other narcotics, sequela                                         |
|                                    |                                                                                    |
| <b>Opioid Poisoning:</b>           |                                                                                    |
| T400X1<br>A                        | Poisoning by opium, accidental (unintentional), initial encounter                  |
| T400X1<br>D                        | Poisoning by opium, accidental (unintentional), subsequent encounter               |
| T400X1S                            | Poisoning by opium, accidental (unintentional), sequela                            |
| T400X4<br>A                        | Poisoning by opium, undetermined, initial encounter                                |
| T400X4<br>D                        | Poisoning by opium, undetermined, subsequent encounter                             |

|             |                                                                                          |
|-------------|------------------------------------------------------------------------------------------|
| T400X4S     | Poisoning by opium, undetermined, sequela                                                |
| T401X1<br>A | Poisoning by heroin, accidental (unintentional), initial encounter                       |
| T401X1<br>D | Poisoning by heroin, accidental (unintentional), subsequent encounter                    |
| T401X1S     | Poisoning by heroin, accidental (unintentional), sequela                                 |
| T401X4<br>A | Poisoning by heroin, undetermined, initial encounter                                     |
| T401X4<br>D | Poisoning by heroin, undetermined, subsequent encounter                                  |
| T401X4S     | Poisoning by heroin, undetermined, sequela                                               |
| T402X1<br>A | Poisoning by other opioids, accidental (unintentional), initial encounter                |
| T402X1<br>D | Poisoning by other opioids, accidental (unintentional), subsequent encounter             |
| T402X1S     | Poisoning by other opioids, accidental (unintentional), sequela                          |
| T402X4<br>A | Poisoning by other opioids, undetermined, initial encounter                              |
| T402X4<br>D | Poisoning by other opioids, undetermined, subsequent encounter                           |
| T402X4S     | Poisoning by other opioids, undetermined, sequela                                        |
| T403X1<br>A | Poisoning by methadone, accidental (unintentional), initial encounter                    |
| T403X1<br>D | Poisoning by methadone, accidental (unintentional), subsequent encounter                 |
| T403X1S     | Poisoning by methadone, accidental (unintentional), sequela                              |
| T403X4<br>A | Poisoning by methadone, undetermined, initial encounter                                  |
| T403X4<br>D | Poisoning by methadone, undetermined, subsequent encounter                               |
| T403X4S     | Poisoning by methadone, undetermined, sequela                                            |
| T404X1<br>A | Poisoning by other synthetic narcotics, accidental (unintentional), initial encounter    |
| T404X1<br>D | Poisoning by other synthetic narcotics, accidental (unintentional), subsequent encounter |
| T404X1S     | Poisoning by other synthetic narcotics, accidental (unintentional), sequela              |
| T404X4<br>A | Poisoning by other synthetic narcotics, undetermined, initial encounter                  |
| T404X4<br>D | Poisoning by other synthetic narcotics, undetermined, subsequent encounter               |
| T404X4S     | Poisoning by other synthetic narcotics, undetermined, sequela                            |
| T40601A     | Poisoning by unspecified narcotics, accidental (unintentional), initial encounter        |
| T40601D     | Poisoning by unspecified narcotics, accidental (unintentional), subsequent encounter     |
| T40601S     | Poisoning by unspecified narcotics, accidental (unintentional), sequela                  |
| T40604A     | Poisoning by unspecified narcotics, undetermined, initial encounter                      |
| T40604D     | Poisoning by unspecified narcotics, undetermined, subsequent encounter                   |
| T40604S     | Poisoning by unspecified narcotics, undetermined, sequela                                |
| T40691A     | Poisoning by other narcotics, accidental (unintentional), initial encounter              |
| T40691D     | Poisoning by other narcotics, accidental (unintentional), subsequent encounter           |

|         |                                                                   |
|---------|-------------------------------------------------------------------|
| T40691S | Poisoning by other narcotics, accidental (unintentional), sequela |
| T40694A | Poisoning by other narcotics, undetermined, initial encounter     |
| T40694D | Poisoning by other narcotics, undetermined, subsequent encounter  |
| T40694S | Poisoning by other narcotics, undetermined, sequela               |

**eTable 2. MarketScan Codes Used to Identify Emergency Department Visits**

|                                                                                                |                                                  |  |  |
|------------------------------------------------------------------------------------------------|--------------------------------------------------|--|--|
| <b>ED visits were defined based on 3 variable domains:</b>                                     |                                                  |  |  |
| <b>1. Attachment G: PROCGRP</b>                                                                |                                                  |  |  |
| 111                                                                                            | Emergency Department Visits                      |  |  |
| 114                                                                                            | ER visits, Other                                 |  |  |
|                                                                                                |                                                  |  |  |
| <b>2. Attachment H: REVCODE</b>                                                                |                                                  |  |  |
| 450                                                                                            | Emergency Room - general classification          |  |  |
| 451                                                                                            | Emergency room - emtala emergency room screening |  |  |
| 452                                                                                            | Emergency room - ER beyond emtala screening      |  |  |
| 456                                                                                            | Emergency room - urgent care                     |  |  |
| 459                                                                                            | Emergency room - other                           |  |  |
| 981                                                                                            | Professional fees - emergency room               |  |  |
|                                                                                                |                                                  |  |  |
| <b>3. Attachment K: STDPLAC</b>                                                                |                                                  |  |  |
| 23                                                                                             | Emergency room - Hospital                        |  |  |
|                                                                                                |                                                  |  |  |
| If patients were captured by any of these codes, they were included in the ED interaction flag |                                                  |  |  |

**eTable 3. MarketScan Codes Used to Identify Outpatient Providers**

| <b># visits with select outpatient providers were identified with the following codes:</b> |                               |  |
|--------------------------------------------------------------------------------------------|-------------------------------|--|
| <b>Attachment L - STDPROV</b>                                                              |                               |  |
| 140                                                                                        | Pain mgmt/Pain medicine       |  |
| 202                                                                                        | Osteopathic Medicine          |  |
| 204                                                                                        | Internal Medicine             |  |
| 240                                                                                        | Family Practice               |  |
| 320                                                                                        | Obstetrics and Gynecology     |  |
| 365                                                                                        | Psychiatry                    |  |
| 400                                                                                        | Pediatrician (general)        |  |
| 458                                                                                        | Child Psychiatry              |  |
| 860                                                                                        | Psychologist                  |  |
|                                                                                            |                               |  |
| <b>"Surgery" included any of the following:</b>                                            |                               |  |
| 500                                                                                        | Surgeon (general)             |  |
| 505                                                                                        | Surgical specialist           |  |
| 510                                                                                        | Colon & Rectal Surgery        |  |
| 520                                                                                        | Neurological Surgery          |  |
| 530                                                                                        | Orthopedic Surgery            |  |
| 535                                                                                        | Abdominal Surgery             |  |
| 520                                                                                        | Cardiovascular Surgery        |  |
| 550                                                                                        | General Vascular Surgery      |  |
| 555                                                                                        | Head and Neck Surgery         |  |
| 560                                                                                        | Pediatric Surgery             |  |
| 565                                                                                        | Surgical Critical Care        |  |
| 570                                                                                        | Transplant Surgery            |  |
| 575                                                                                        | Traumatic Surgery             |  |
| 580                                                                                        | Cardiothoracic Surgery        |  |
| 585                                                                                        | Thoracic Surgery              |  |
|                                                                                            |                               |  |
| <b>"Chemical Dependency / Mental Health Tx" included:</b>                                  |                               |  |
| 15                                                                                         | Treatment Center              |  |
| 20                                                                                         | Mental Health/Chemical Dep    |  |
| 21                                                                                         | Mental Health Facilities      |  |
| 22                                                                                         | Chem Depend Treatment Ctr     |  |
| 23                                                                                         | Mental Hlth/Chem Dep Day Care |  |
| 35                                                                                         | Residential Treatment Center  |  |

**eTable 4: ICD-10 Codes Used to Identify Other Substance Use Disorders and Mental Health Diagnoses**

| <b>Anxiety Disorders:</b>                    |                                              |
|----------------------------------------------|----------------------------------------------|
| F40                                          | Phobic Anxiety Disorders                     |
| F41                                          | Other Anxiety Disorders                      |
| F42                                          | Obsessive-compulsive disorder                |
|                                              |                                              |
| F43.1                                        | Post-traumatic Stress Disorder (PTSD)        |
|                                              |                                              |
| <b>Mood Disorders:</b>                       |                                              |
| F30                                          | Manic Episode                                |
| F31                                          | Bipolar Disorder                             |
| F32                                          | Major Depressive Disorder, single episode    |
| F33                                          | Major depressive disorder, recurrent         |
| F34                                          | Persistent mood disorder                     |
| F39                                          | Unspecified Mood disorder                    |
|                                              |                                              |
| <b>Other Substance Use Disorders:</b>        |                                              |
| <b>Alcohol:</b>                              |                                              |
| F10                                          | Alcohol Related Disorders                    |
| G62.1                                        | Alcoholic polyneuropathy                     |
| I42.6                                        | Alcoholic cardiomyopathy                     |
| K29.20                                       | Alcoholic gastritis without bleeding         |
| K29.21                                       | Alcoholic gastritis with bleeding            |
| K70.0                                        | Alcoholic fatty liver                        |
| K70.10                                       | Acute alcoholic hepatitis                    |
| K70.9                                        | Chronic alcoholic hepatitis                  |
| K70.30                                       | Alcoholic cirrhosis of liver without ascites |
| T51.0X1A<br>T51.0X2A<br>T51.0X3A<br>T51.0X4A | Toxic effect of ethanol                      |
| T51.1X1A<br>T51.1X2A<br>T51.1X3A<br>T51.1X4A | Toxic effect of methanol                     |
| T51.2X1A<br>T51.2X2A<br>T51.2X3A<br>T51.2X4A | Toxic effect of 2-Propanol                   |
| T51.3X1A<br>T51.3X2A<br>T51.3X3A<br>T51.3X4A | Toxic effect of fusel oil                    |
| T51.8X1A<br>T51.8X2A<br>T51.8X3A<br>T51.8X4A | Toxic effect of other specified alcohols     |
| T51.9X1A                                     | Toxic effect of unspecified alcohol          |



|                                  |                                                     |
|----------------------------------|-----------------------------------------------------|
| T51.9X2A<br>T51.9X3A<br>T51.9X4A |                                                     |
| <b>Non-alcohol:</b>              |                                                     |
| F12                              | Cannabis Related Disorders                          |
| F13                              | Sedative, hypnotic, or anxiolytic related disorders |
| F14                              | Cocaine related disorders                           |
| F15                              | Other stimulant related disorders                   |
| F16                              | Hallucinogen related disorders                      |
| F18                              | Inhalant related disorders                          |
| F19                              | Other psychoactive substance related disorders      |

**eTable 5. Red Book Naloxone Medications****The following medications were included in our analyses:**

| <b>GENNME</b>          | <b>PRODNME</b>             |
|------------------------|----------------------------|
| NALOXONE HYDROCHLORIDE | EVZIO                      |
| NALOXONE HYDROCHLORIDE | NALOXONE HCL               |
| NALOXONE HYDROCHLORIDE | NALOXONE HCL NOVAPLUS      |
| NALOXONE HYDROCHLORIDE | NARCAN                     |
| NALOXONE HYDROCHLORIDE | PREMIERPRO RX NALOXONE HCL |
| NALOXONE HYDROCHLORIDE | NALOXONE HCL ANHYDROUS     |
| NALOXONE HYDROCHLORIDE | NALOXONE HCL DIHYDRATE     |

**The following medications were excluded in our analyses:**

| <b>GENNME</b>                                          | <b>PRODNME</b>               |
|--------------------------------------------------------|------------------------------|
| BUPRENORPHINE/NALOXONE                                 | BUNAVAIL                     |
| BUPRENORPHINE/NALOXONE                                 | BUPRENORPHINE-NALOXONE       |
| BUPRENORPHINE/NALOXONE                                 | SUBOXONE                     |
| BUPRENORPHINE/NALOXONE                                 | ZUBSOLV                      |
| NALOXONE<br>HYDROCHLORIDE/PENTAZOCINE<br>HYDROCHLORIDE | NALOXONE/PENTAZOCINE         |
| NALOXONE<br>HYDROCHLORIDE/PENTAZOCINE<br>HYDROCHLORIDE | PENTAZOCIN/NALOXONE          |
| NALOXONE<br>HYDROCHLORIDE/PENTAZOCINE<br>HYDROCHLORIDE | PENTAZOCINE HCL-NALOXONE HCL |
| NALOXONE<br>HYDROCHLORIDE/PENTAZOCINE<br>HYDROCHLORIDE | TALWIN NX                    |
| NALOXONE HYDROCHLORIDE                                 | NARCAN NEONATAL              |
